# Supplementary material
Source: publisher site journal article supplement (https://www.dovepress.com/get_supplementary_file.php?f=221339.docx)
Supplement: Supplementary file 1 [file get_supplementary_file.php]

**Table S1 The sequence of primers**

| Primer name | Sequence |
| --- | --- |
| RRM2-F | GAGATTTAAAGGCTGCTGGAGTG |
| RRM2-R  miR-143-3p-RT | GAGGGAGAGCATAGTGGAGGC  GTCGTATCCAGTGCAGGGTCCGAGGTATTCGCACTGGATACGACAGAGCTA |
| miR-143-3p-F | TGAGATGAAGCACTG |
| miR-143-3p-R | GTGCAGGGTCCGAGGT |
| U6-RT | GTCGTATCCAGTGCAGGGTCCGAGGTATTCGCACTGGATACGACAAATATG |
| GAPDH-F | ATGGGGAAGGTGAAGGTCG |
| GAPDH-R | GGGGTCATTGATGGCAACAATA |

**Table S2. The sequence of miRNA**

| siRNA name | Sequence |
| --- | --- |
| RRM2-siRNA | GGAGAGAGUAAGAGAAAUA UU |
| miR-143-3p mimic | UGAGAUGAAGCACUGUAGCUC |
| anti-miR-143-3p | GAGCUACAGACUACAUCUCA |
| Mock  LINC00667-siRNA | UUCUCCGAACGUGUCACGUUU  GCCCUCAAUAAAGAUUAAAUU |
